# Supplementary material
Source: MDPI journal article supplement (https://www.mdpi.com/1424-8247/16/3/333)
Supplement: s1 [file s1]

## Supporting information For

### **Novel indole fused chromene derivatives: Synthesis, cytotoxic properties and key computational insights**

M. Shaheer Malik<sup>a\*†</sup>, Hissana Ather<sup>b\*†</sup>, Shaik Mohammad Asif Ansari<sup>c</sup>, Ayesha Siddiqua<sup>c</sup>, Qazi Mohammad Sajid Jamal<sup>d</sup>, Ali H. Alharbi,<sup>d</sup> Munirah M. Al-Rooqi<sup>a</sup>, Rabab S. Jassas<sup>e</sup>, Essam M. Hussein<sup>a,f</sup>, Ziad Moussa<sup>g</sup>, Rami J. Obaid<sup>a</sup> and Saleh A. Ahmed<sup>a,e\*</sup>

<sup>a</sup>Department of Chemistry, Faculty of Applied Sciences, Umm Al-Qura University, Makkah 21955, Saudi Arabia

<sup>b</sup>Department of Pharmaceutical Chemistry, College of Pharmacy, King Khalid University (KKU), Abha 62529, Saudi Arabia

<sup>c</sup>Department of Clinical Pharmacy, College of Pharmacy, King Khalid University (KKU), Abha 62529, Saudi Arabia.

<sup>d</sup>Department of Health Informatics, College of Public Health and Health Informatics, Qassim University, Al Bukayriyah, Saudi Arabia

<sup>e</sup>Department of Chemistry, Jamoum University College, Umm Al-Qura University, 21955 Makkah, Saudi Arabia

<sup>f</sup>Department of Chemistry, Faculty of Science, Assiut University, 71516 Assiut, Egypt

<sup>g</sup>Department of Chemistry, College of Science, United Arab Emirates University, 15551 Al Ain, United Arab Emirates

#### **Correspondence: may be addressed to:**

M. Shaheer Malik, E-mail address: [msmalik@uqu.edu.sa](mailto:msmalik@uqu.edu.sa), Hissana Ather, E-mail address: [hissana@kku.edu.sa](mailto:hissana@kku.edu.sa), Saleh A. Ahmed, E-mail address: [saahmed@uqu.edu.sa](mailto:saahmed@uqu.edu.sa)

- **Table S1:** Physicochemical properties of compounds **4a-j**
- **Table S2:** Lipophilicity and water solubility of compounds **4a-j**
- **Table S3:** Some other water solubility parameters of compounds **4a-j**
- **Table S4:** Pharmacokinetics parameters of compounds **4a-j**
- **Table S5:** Drug likeness and medicinal chemistry of compounds **4a-j**
- Spectra

**Table S1:** Physicochemical properties of compounds **4a-j**

| Molecule | #Heavy atoms | #Aromatic heavy atoms | Fraction Csp3 | #Rotatable bonds | #H-bond acceptors | #H-bond donors | MR     | TPSA   |
|----------|--------------|-----------------------|---------------|------------------|-------------------|----------------|--------|--------|
| 4a       | 26           | 9                     | 0.33          | 1                | 3                 | 1              | 99.35  | 81.04  |
| 4b       | 27           | 9                     | 0.36          | 2                | 3                 | 1              | 104.16 | 81.04  |
| 4c       | 27           | 9                     | 0.33          | 1                | 4                 | 1              | 99.31  | 81.04  |
| 4d       | 28           | 9                     | 0.36          | 2                | 4                 | 1              | 104.11 | 81.04  |
| 4e       | 29           | 9                     | 0.33          | 2                | 5                 | 1              | 108.17 | 126.86 |
| 4f       | 30           | 9                     | 0.36          | 3                | 5                 | 1              | 112.98 | 126.86 |
| 4g       | 28           | 9                     | 0.36          | 2                | 4                 | 1              | 105.84 | 90.27  |
| 4h       | 29           | 9                     | 0.39          | 3                | 4                 | 1              | 110.65 | 90.27  |
| 4i       | 27           | 9                     | 0.33          | 1                | 3                 | 1              | 107.05 | 81.04  |
| 4j       | 28           | 9                     | 0.36          | 2                | 3                 | 1              | 111.86 | 81.04  |
| CTRL     | 26           | 12                    | 0.17          | 3                | 4                 | 3              | 101.36 | 129.54 |

**Table S2:** Lipophilicity and water solubility of compounds **4a-j**

| Molecule | iLOGP | XLOGP3 | WLOGP | MLOGP | Silicos-IT<br>Log P | Consensus<br>Log P | ESOL<br>Log S | ESOL<br>Solubility<br>(mg/ml) |
|----------|-------|--------|-------|-------|---------------------|--------------------|---------------|-------------------------------|
| 4a       | 2.81  | 2.94   | 3.63  | 1.57  | 3.01                | 2.79               | -4.04         | 3.20E-02                      |
| 4b       | 2.97  | 3.24   | 4.11  | 1.79  | 3.4                 | 3.1                | -4.24         | 2.10E-02                      |
| 4c       | 2.94  | 3.04   | 4.19  | 1.95  | 3.43                | 3.11               | -4.2          | 2.30E-02                      |
| 4d       | 3.11  | 3.34   | 4.67  | 2.17  | 3.82                | 3.42               | -4.4          | 1.50E-02                      |
| 4e       | 2.57  | 2.77   | 3.54  | 1.46  | 0.85                | 2.24               | -4.12         | 3.01E-02                      |
| 4f       | 2.73  | 3.07   | 4.02  | 1.68  | 1.25                | 2.55               | -4.32         | 1.95E-02                      |
| 4g       | 3.04  | 2.91   | 3.64  | 1.24  | 3.07                | 2.78               | -4.12         | 2.87E-02                      |
| 4h       | 3.03  | 3.21   | 4.12  | 1.46  | 3.47                | 3.06               | -4.32         | 1.87E-02                      |
| 4i       | 3.2   | 3.63   | 4.39  | 2.17  | 3.69                | 3.42               | -4.95         | 4.78E-03                      |
| 4j       | 3.38  | 3.93   | 4.87  | 2.38  | 4.08                | 3.73               | -5.15         | 3.10E-03                      |
| CTRL     | 26    | 12     | 0.17  | 3     | 4                   | 3                  | 101.36        | 129.54                        |

**Table S3:** Some other water solubility parameters of compounds **4a-j**

| Molecule | ESOL Class            | Ali<br>Log S | Ali<br>Solubility<br>(mg/ml) | Ali<br>Solubility<br>(mol/l) | Ali Class             | Silicos-<br>IT<br>LogSw | Silicos-IT<br>Solubility<br>(mg/ml) | Silicos-IT<br>Solubility<br>(mol/l) | Silicos-IT<br>class   |
|----------|-----------------------|--------------|------------------------------|------------------------------|-----------------------|-------------------------|-------------------------------------|-------------------------------------|-----------------------|
| 4a       | Moderately<br>soluble | -4.3         | 1.73E-02                     | 4.97E-05                     | Moderately<br>soluble | -5.13                   | 2.55E-03                            | 7.35E-06                            | Moderately<br>soluble |
| 4b       | Moderately<br>soluble | -4.62        | 8.77E-03                     | 2.43E-05                     | Moderately<br>soluble | -5.53                   | 1.07E-03                            | 2.96E-06                            | Moderately<br>soluble |
| 4c       | Moderately<br>soluble | -4.41        | 1.43E-02                     | 3.91E-05                     | Moderately<br>soluble | -5.4                    | 1.45E-03                            | 3.97E-06                            | Moderately<br>soluble |
| 4d       | Moderately<br>soluble | -4.72        | 7.25E-03                     | 1.91E-05                     | Moderately<br>soluble | -5.79                   | 6.08E-04                            | 1.60E-06                            | Moderately<br>soluble |
| 4e       | Moderately<br>soluble | -5.09        | 3.19E-03                     | 8.13E-06                     | Moderately<br>soluble | -4.48                   | 1.30E-02                            | 3.31E-05                            | Moderately<br>soluble |
| 4f       | Moderately<br>soluble | -5.4         | 1.61E-03                     | 3.97E-06                     | Moderately<br>soluble | -4.87                   | 5.44E-03                            | 1.34E-05                            | Moderately<br>soluble |
| 4g       | Moderately<br>soluble | -4.47        | 1.29E-02                     | 3.42E-05                     | Moderately<br>soluble | -5.24                   | 2.17E-03                            | 5.75E-06                            | Moderately<br>soluble |
| 4h       | Moderately<br>soluble | -4.78        | 6.53E-03                     | 1.67E-05                     | Moderately<br>soluble | -5.63                   | 9.09E-04                            | 2.32E-06                            | Moderately<br>soluble |
| 4i       | Moderately<br>soluble | -5.02        | 4.07E-03                     | 9.55E-06                     | Moderately<br>soluble | -5.92                   | 5.10E-04                            | 1.20E-06                            | Moderately<br>soluble |

|           |                    |       |          |          |                    |       |          |          |                    |
|-----------|--------------------|-------|----------|----------|--------------------|-------|----------|----------|--------------------|
| <b>4j</b> | Moderately soluble | -5.33 | 2.05E-03 | 4.66E-06 | Moderately soluble | -6.31 | 2.14E-04 | 4.86E-07 | Poorly soluble     |
| CTRL      | Moderately soluble | -4.94 | 4.81E-03 | 1.15E-05 | Moderately soluble | -5.25 | 2.36E-03 | 5.65E-06 | Moderately soluble |

**Table S4:** Pharmacokinetics parameters of compounds **4a-j**

| Molecule  | GI absorption | BBB permeant | Pgp substrate | CYP1A2 inhibitor | CYP2C19 inhibitor | CYP2C9 inhibitor | CYP2D6 inhibitor | CYP3A4 inhibitor | log Kp (cm/s) |
|-----------|---------------|--------------|---------------|------------------|-------------------|------------------|------------------|------------------|---------------|
| <b>4a</b> | High          | No           | Yes           | Yes              | Yes               | Yes              | No               | Yes              | -6.33         |
| <b>4b</b> | High          | No           | Yes           | Yes              | Yes               | Yes              | No               | Yes              | -6.2          |
| <b>4c</b> | High          | No           | Yes           | Yes              | Yes               | Yes              | No               | Yes              | -6.37         |
| <b>4d</b> | High          | No           | Yes           | No               | Yes               | Yes              | No               | Yes              | -6.24         |
| <b>4e</b> | High          | No           | Yes           | No               | Yes               | Yes              | No               | Yes              | -6.73         |
| <b>4f</b> | Low           | No           | Yes           | No               | Yes               | Yes              | No               | Yes              | -6.6          |
| <b>4g</b> | High          | No           | Yes           | No               | Yes               | Yes              | No               | Yes              | -6.54         |
| <b>4h</b> | High          | No           | Yes           | No               | Yes               | Yes              | No               | Yes              | -6.41         |
| <b>4i</b> | High          | No           | Yes           | Yes              | Yes               | Yes              | No               | Yes              | -6.32         |
| <b>4j</b> | High          | No           | Yes           | No               | Yes               | Yes              | No               | Yes              | -6.2          |
| CTRL      | High          | No           | Yes           | Yes              | Yes               | Yes              | Yes              | Yes              | -7.02         |

**Table S5:** Drug likeness and medicinal chemistry of compounds **4a-j**

| Molecule  | Lipinski #violations | Ghose #violations | Veber #violations | Egan #violations | Muegge #violations | Bioavailability Score | PAINS #alerts | Brenk #alerts | Leadlikeness #violations | Synthetic accessibility |
|-----------|----------------------|-------------------|-------------------|------------------|--------------------|-----------------------|---------------|---------------|--------------------------|-------------------------|
| <b>4a</b> | 0                    | 0                 | 0                 | 0                | 0                  | 0.56                  | 0             | 0             | 0                        | 4.19                    |
| <b>4b</b> | 0                    | 0                 | 0                 | 0                | 0                  | 0.56                  | 0             | 0             | 1                        | 4.29                    |
| <b>4c</b> | 0                    | 0                 | 0                 | 0                | 0                  | 0.56                  | 0             | 0             | 1                        | 4.18                    |
| <b>4d</b> | 0                    | 0                 | 0                 | 0                | 0                  | 0.56                  | 0             | 0             | 1                        | 4.3                     |
| <b>4e</b> | 0                    | 0                 | 0                 | 0                | 0                  | 0.56                  | 0             | 2             | 1                        | 4.29                    |
| <b>4f</b> | 0                    | 0                 | 0                 | 0                | 0                  | 0.56                  | 0             | 2             | 1                        | 4.39                    |
| <b>4g</b> | 0                    | 0                 | 0                 | 0                | 0                  | 0.56                  | 0             | 0             | 1                        | 4.27                    |
| <b>4h</b> | 0                    | 0                 | 0                 | 0                | 0                  | 0.56                  | 0             | 0             | 1                        | 4.38                    |
| <b>4i</b> | 0                    | 0                 | 0                 | 0                | 0                  | 0.56                  | 0             | 0             | 2                        | 4.19                    |
| <b>4j</b> | 0                    | 0                 | 0                 | 0                | 0                  | 0.56                  | 0             | 0             | 2                        | 4.29                    |
| CTRL      | 0                    | 0                 | 0                 | 0                | 0                  | 0.55                  | 0             | 1             | 1                        | 4.14                    |

## Spectroscopic Characterization of the Synthesized Compounds

<sup>1</sup>H CDCl<sub>3</sub>  
Bruker NMR 400MHz

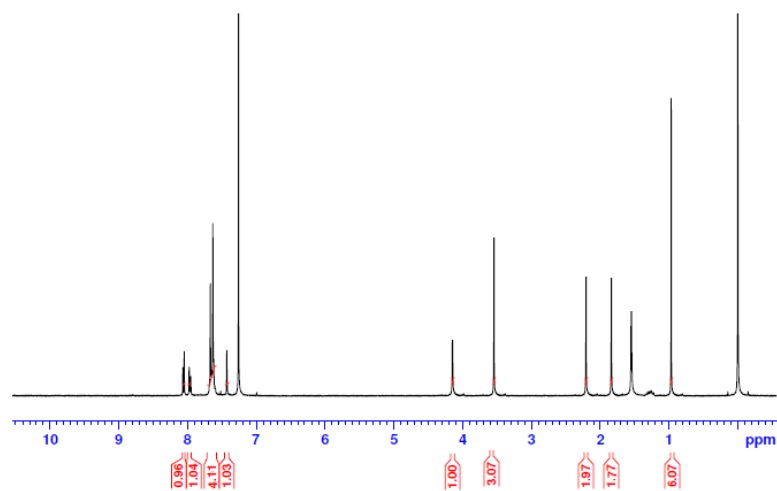

<sup>1</sup>H NMR spectrum of compound **4a**

CDCl<sub>3</sub>  
Bruker NMR 400MHz

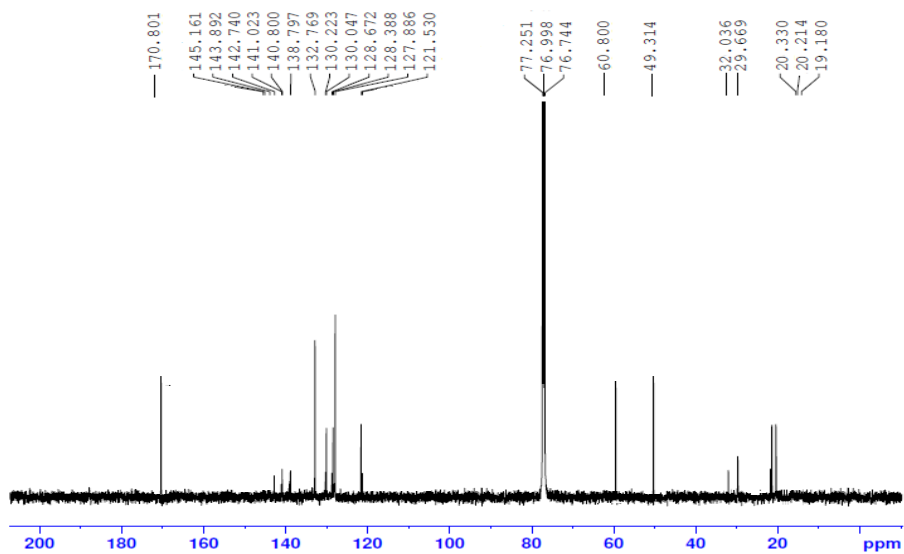

<sup>13</sup>C NMR spectrum of compound **4a**

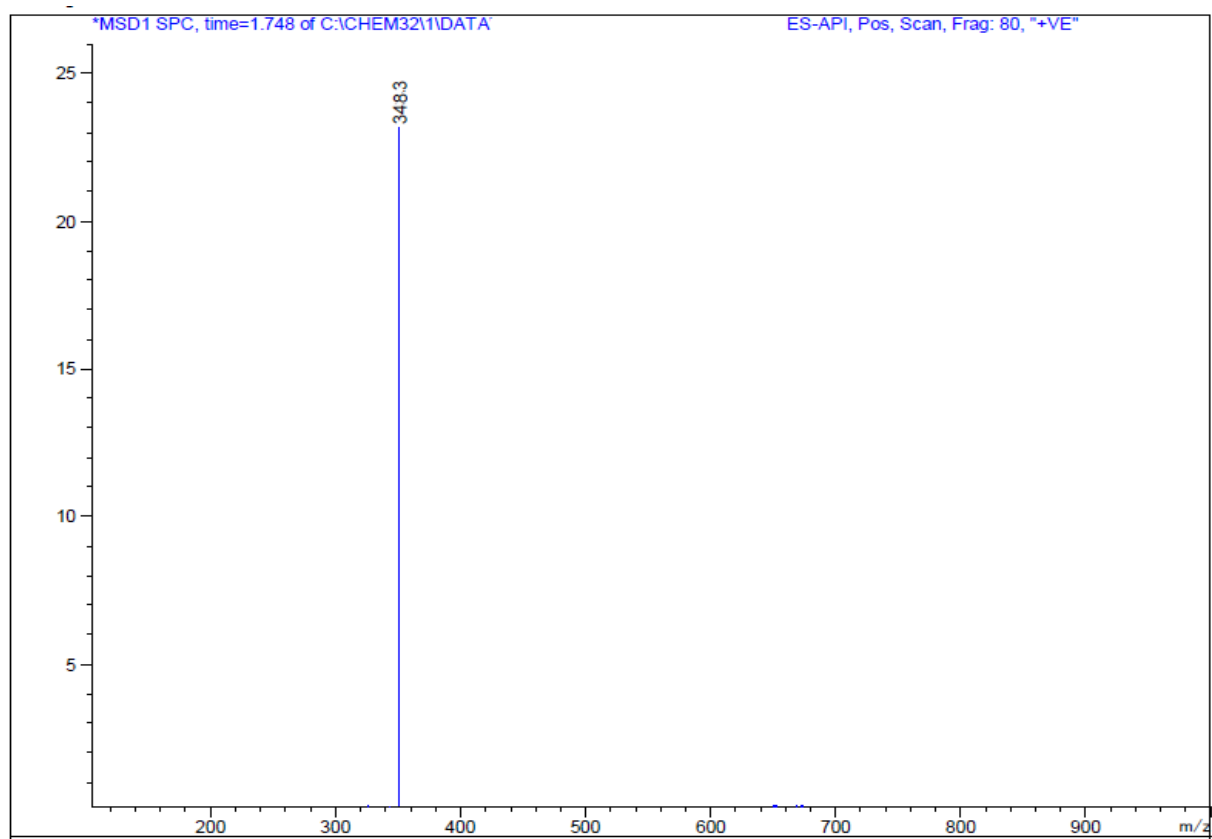

Mass spectrum of compound **4a**

<sup>1</sup>H CDCl<sub>3</sub>  
Bruker NMR 400MHz

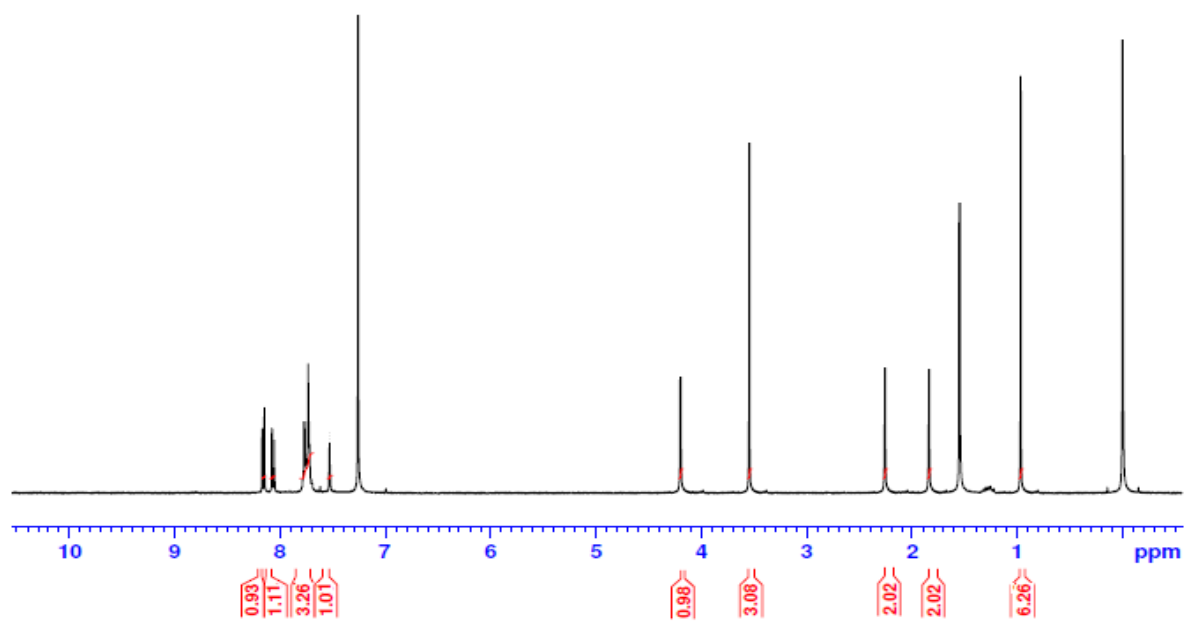

<sup>1</sup>H NMR spectrum of compound **4c**

CDC13  
Bruker NMR 400MHz

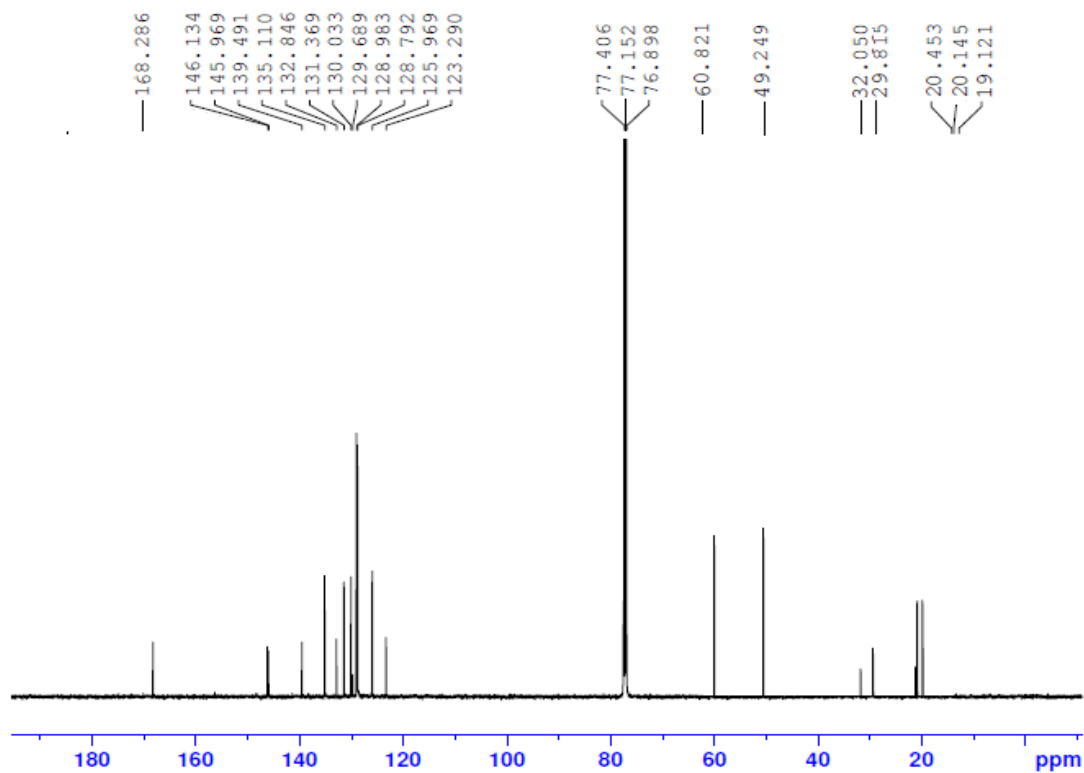

$^{13}\text{C}$  NMR spectrum of compound **4c**

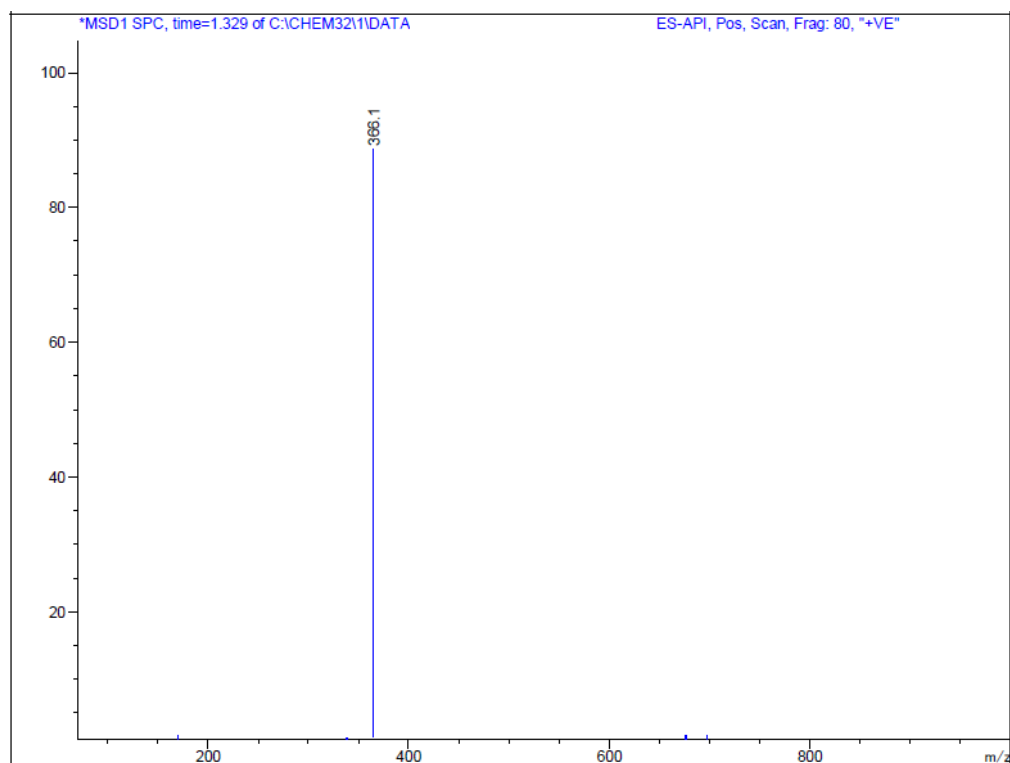

Mass spectrum of compound **4c**

<sup>1</sup>H CDCl<sub>3</sub>  
Bruker NMR 400MHz

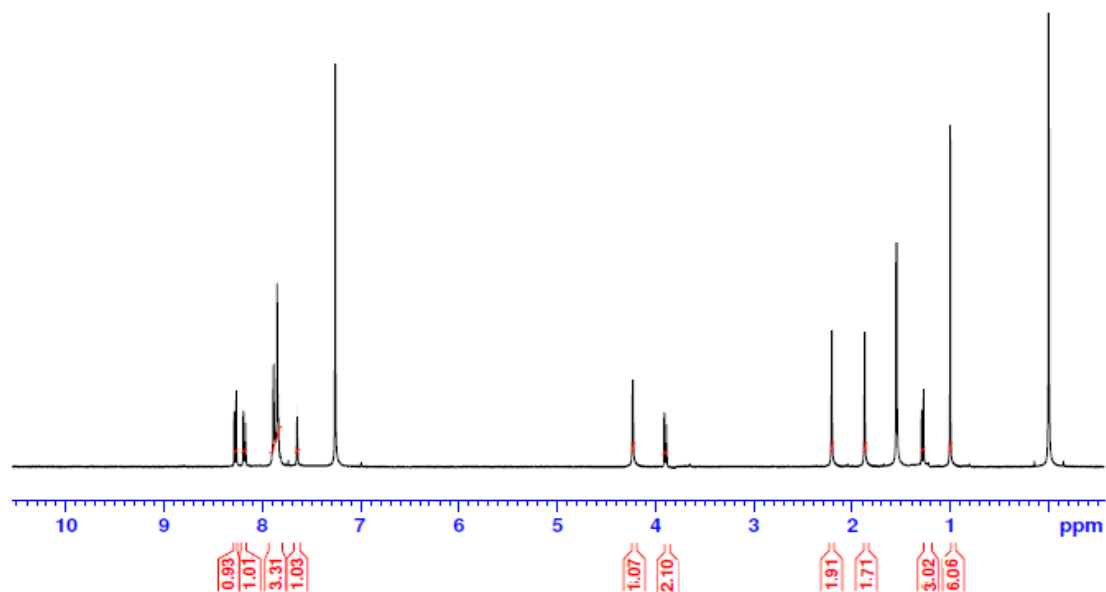

<sup>1</sup>H NMR spectrum of compound **4d**

CDCl<sub>3</sub>  
Bruker NMR 400MHz

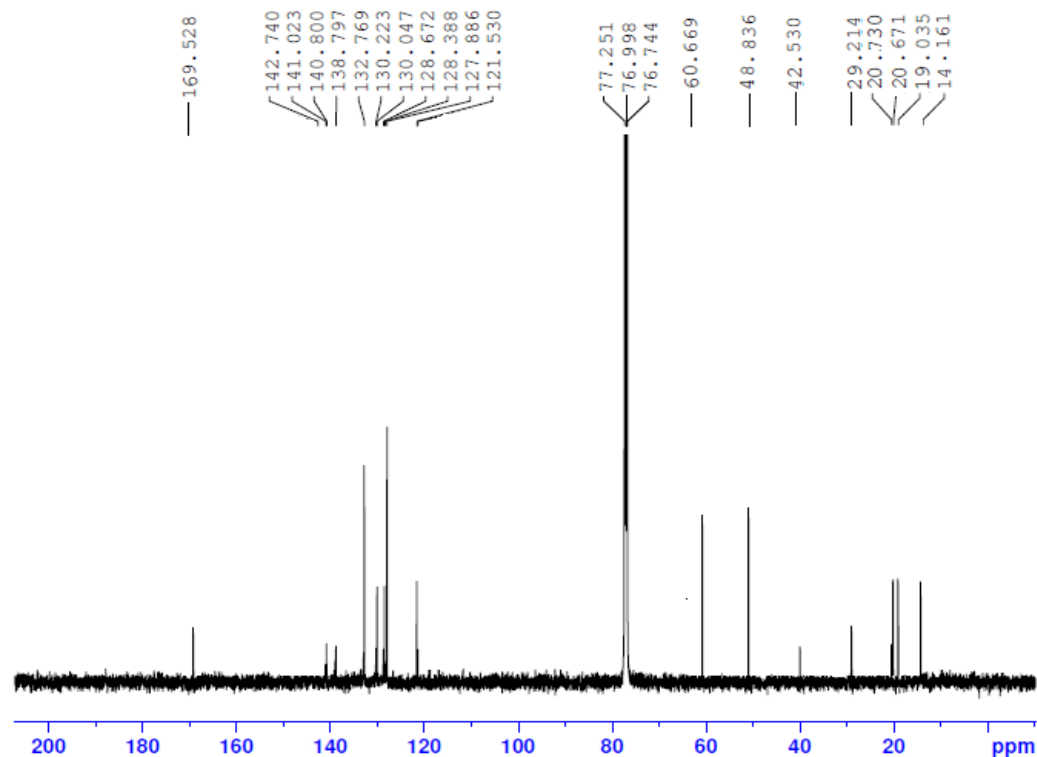

<sup>13</sup>C NMR spectrum of compound **4d**



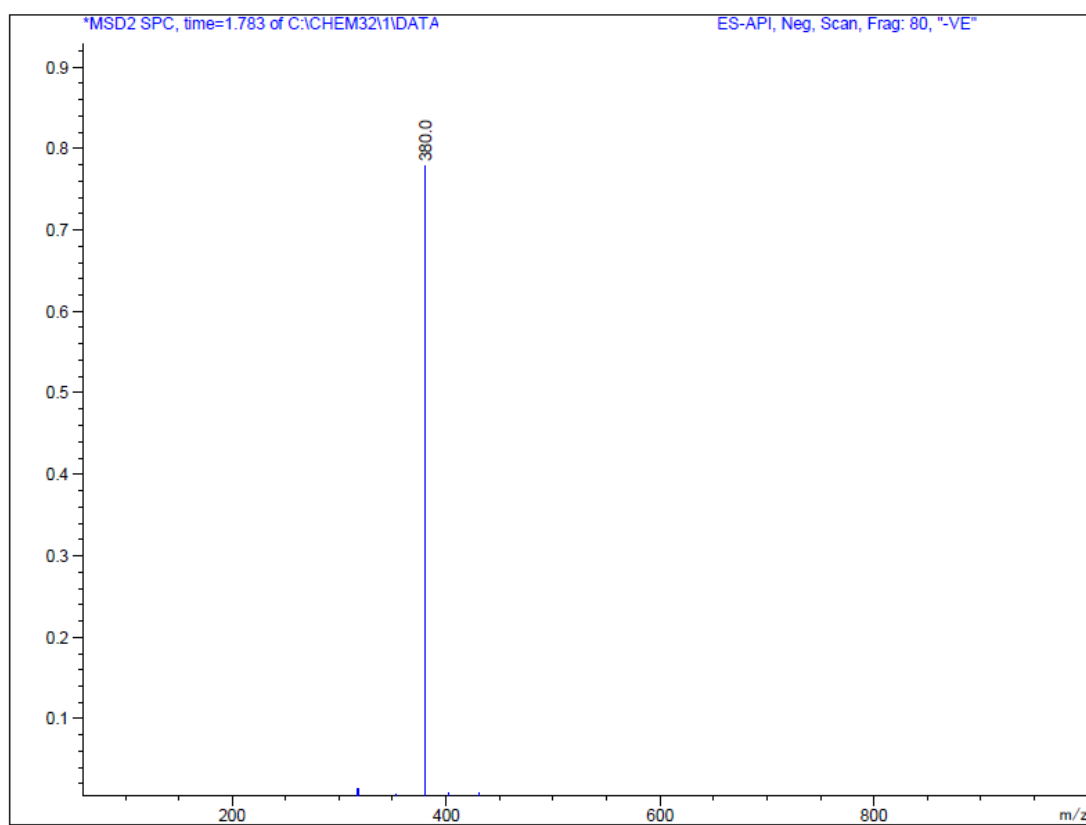

Mass spectrum of compound **4d**

<sup>1</sup>H CDCl<sub>3</sub>  
Bruker NMR 400MHz

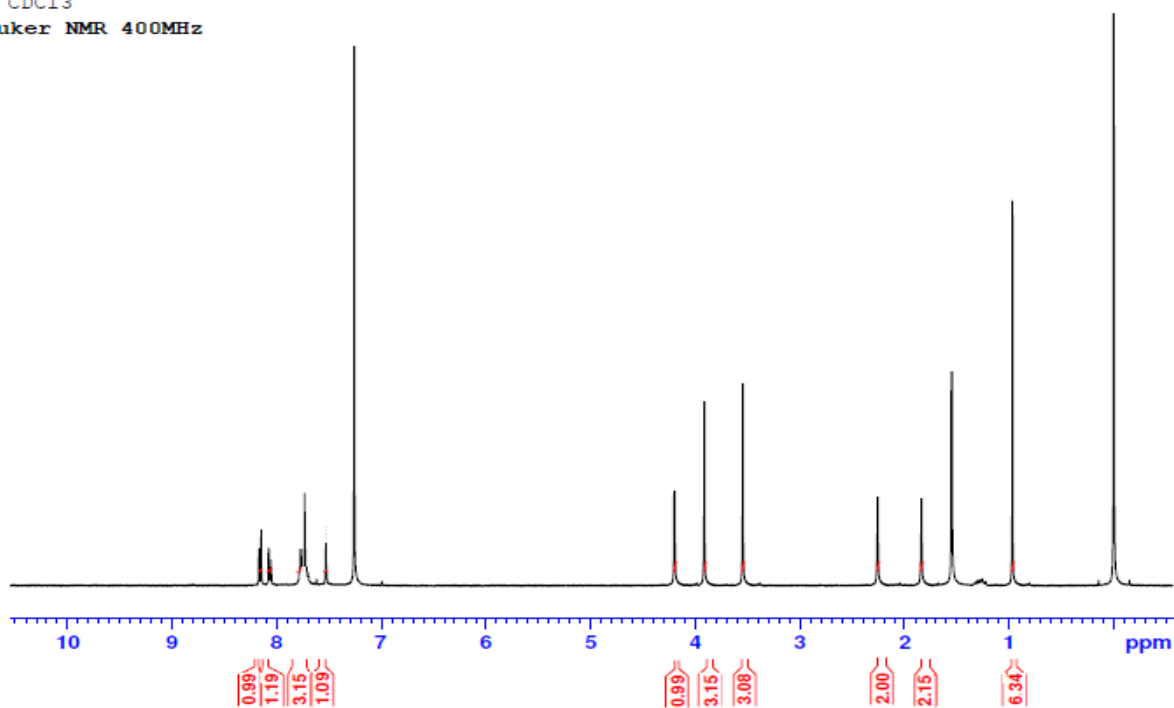

<sup>1</sup>H NMR spectrum of compound **4g**

CDC13  
Bruker NMR 400MHz

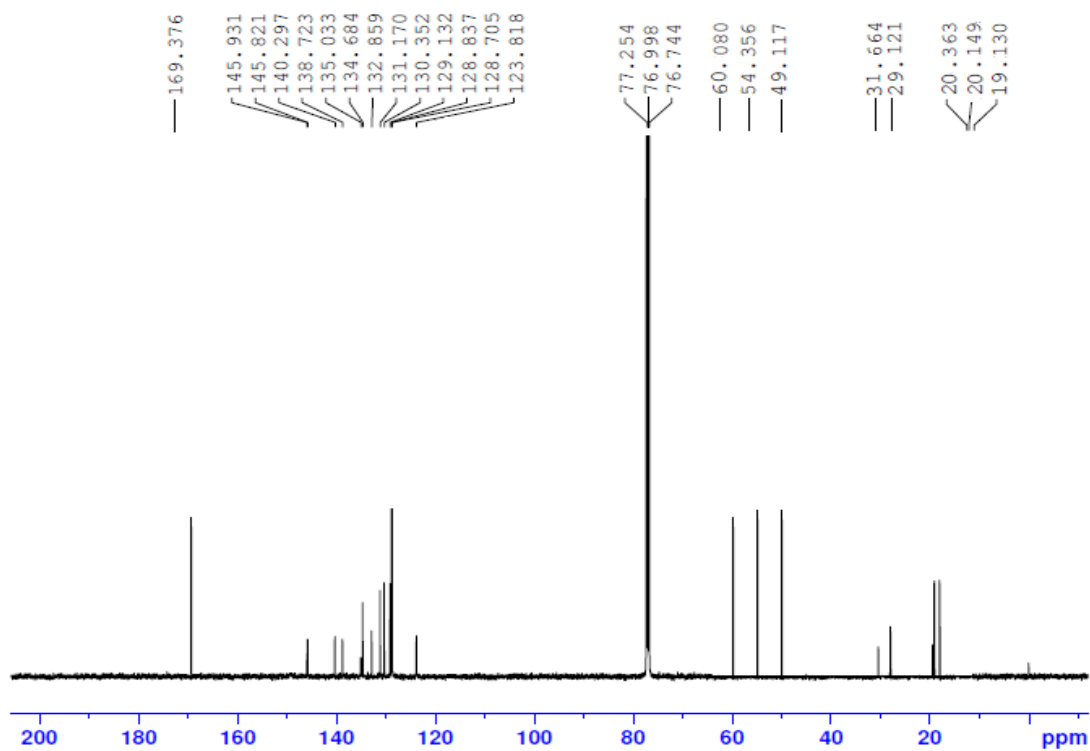

<sup>13</sup>C NMR spectrum of compound **4g**

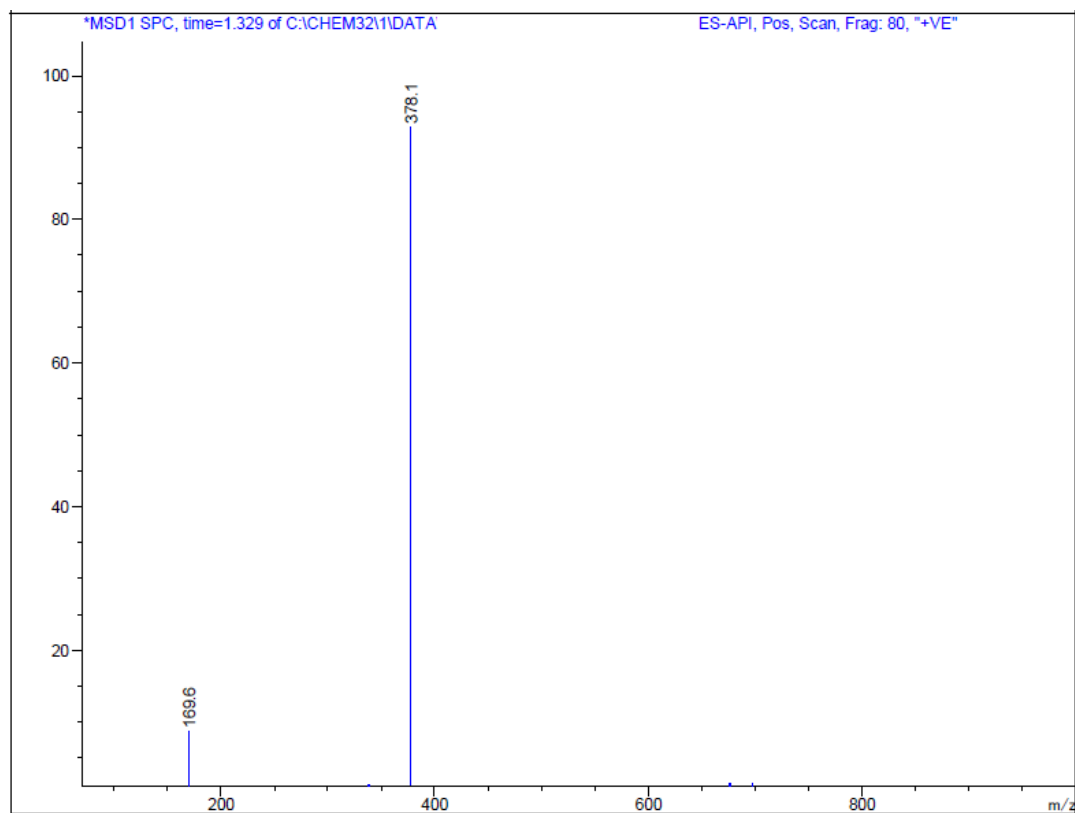

Mass spectrum of compound **4g**
